# Supplementary material for: An amorphous FeCoNiMnCr high-entropy alloy supported by 2H-MoS2 on carbon cloth as a highly efficient and robust electrocatalyst for water oxidation
Source: Royal Society of Chemistry journal article supplement (doi:10.1039/d3nj01381b), 2023-01-01
Supplement: d3nj01381b1.pdf [file d3nj01381b1.pdf]

## *Supporting information*

### **Amorphous FeCoNiMnCr high-entropy alloy supported by 2H-MoS<sub>2</sub> on carbon cloth as a highly efficient and robust electrocatalyst for water oxidation**

Weiwen Cao,<sup>1,#</sup> Xuanyu Yang,<sup>1,#</sup> Weiji Dai,<sup>1,\*</sup> Bing Wu,<sup>1</sup> Yudong Zhang,<sup>1</sup> Cuijiao Zhao,<sup>1</sup> Yanwei Sui,<sup>2</sup> Saifang Huang<sup>1,\*</sup>

<sup>1</sup> School of Materials Science and Engineering, Jiangsu University of Science and Technology, Zhenjiang 212003, P. R. China

<sup>2</sup> Jiangsu Province High-efficiency Energy Storage Technology and Equipment Engineering Laboratory, School of Materials Science and Physics, China University of

Mining and Technology, Xuzhou 221116, P R China

\* Corresponding authors. Email: daiweiji@just.edu.cn (W. Dai), s.huang@just.edu.cn

(S. Huang)

# These authors contributed equally.

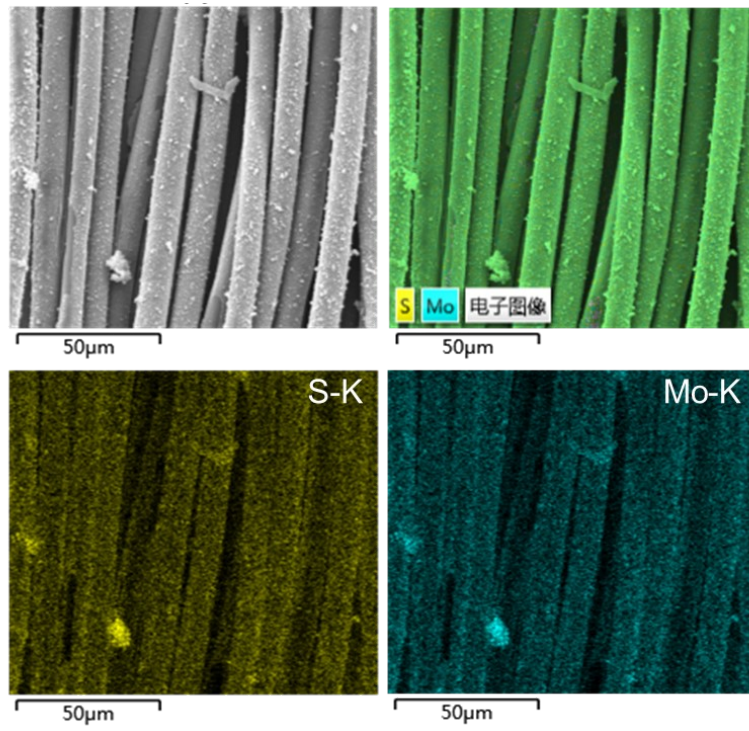

**Figure S1.** EDS elemental mappings of MoS<sub>2</sub>-CC.

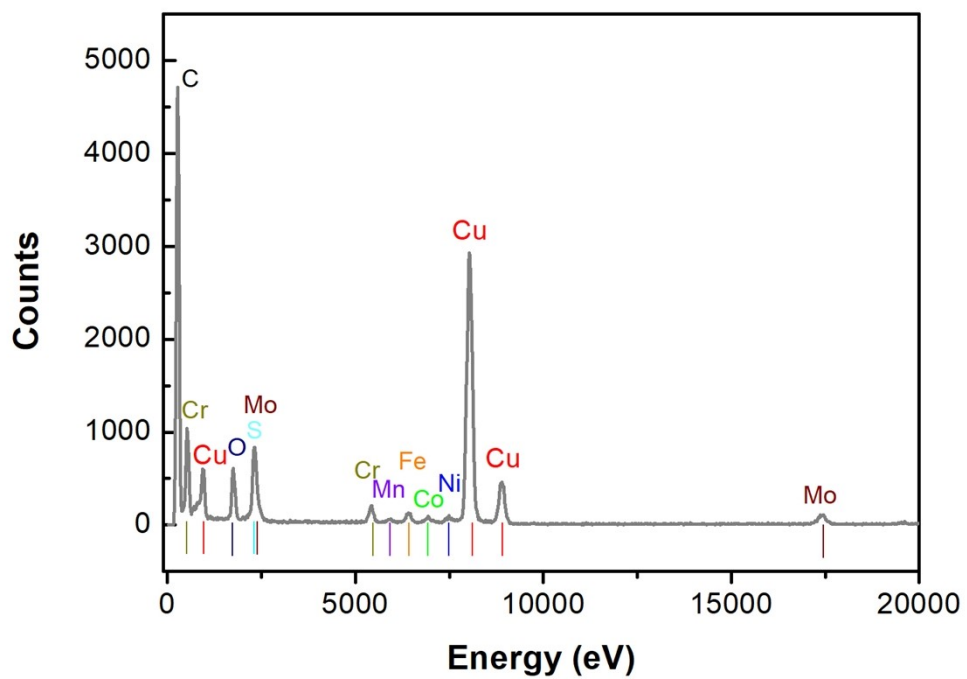

**Figure S2.** EDS pattern of FeCoNiMnCr@MoS<sub>2</sub> electrocatalyst.

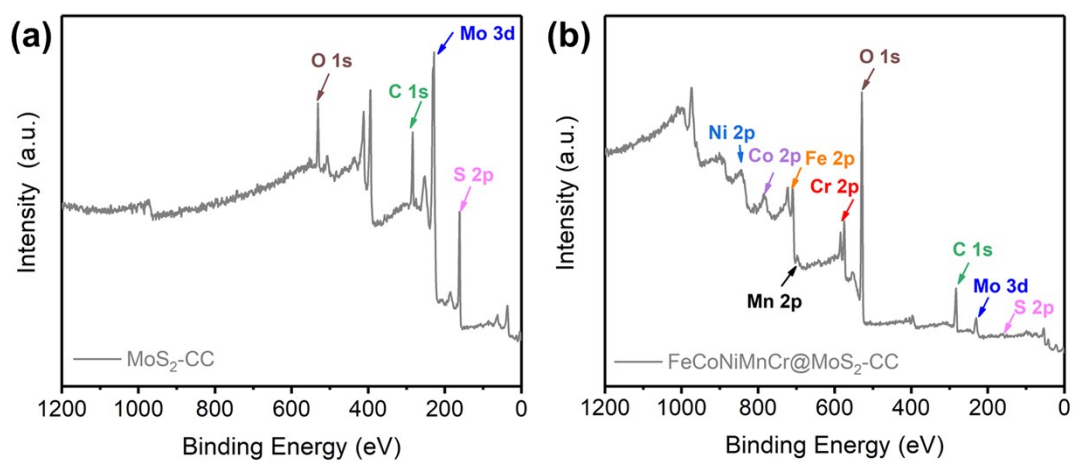

**Figure S3.** XPS survey spectra. (a) MoS<sub>2</sub>-CC, (b) FeCoNiMnCr@MoS<sub>2</sub>-CC.

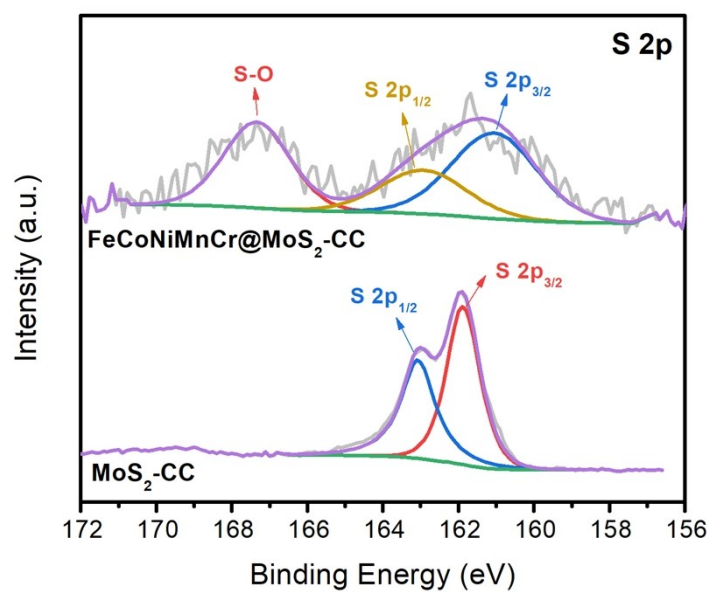

**Figure S4.** High-resolution XPS spectra of S 2p.

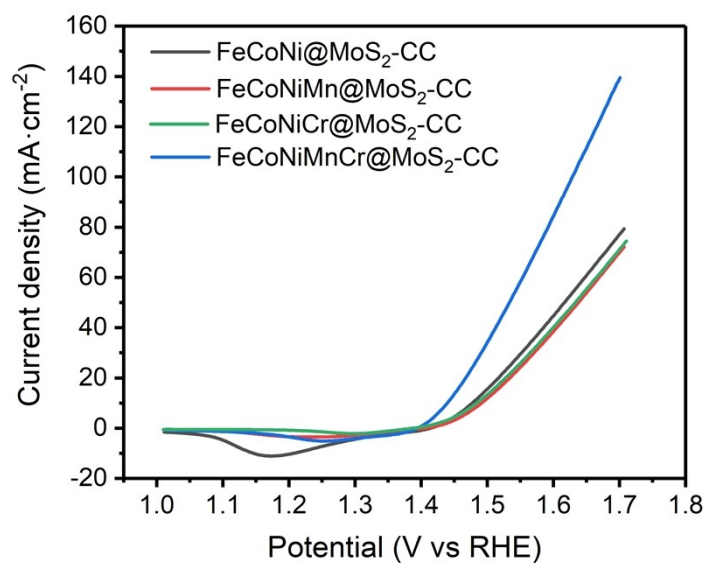

**Figure S5.** CV scanning curves of MoS<sub>2</sub>-CC loading with trimetallic and tetrametallic alloys.

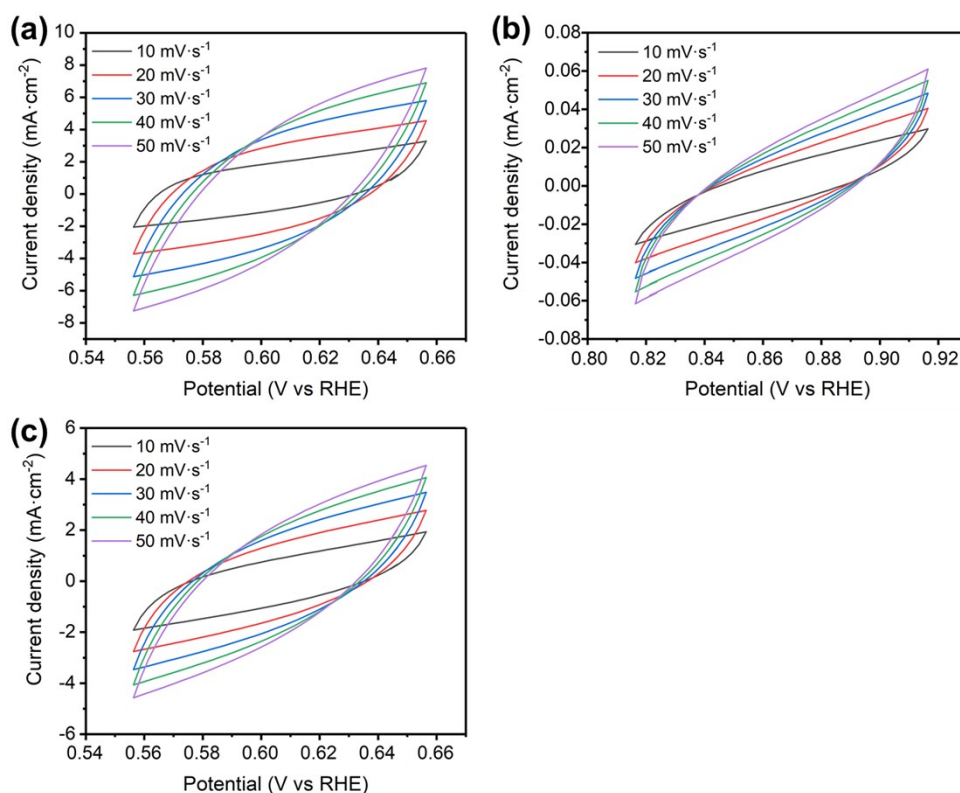

**Figure S6.** CV scanning curves with various scan rates (10, 20, 30, 40 and 50 mV s<sup>-1</sup>).

(a) MoS<sub>2</sub>-CC, (b) FeCoNiMnCr-CC, (c) FeCoNiMnCr@MoS<sub>2</sub>-CC.

**Table S1.** OER performances of some recently reported electrocatalysts.

| Electrocatalysts                                        | Electrolyte   | $\eta_{10}/\text{mV}$ | Tafel slope/<br>$\text{mV dec}^{-1}$ | References                                  |
|---------------------------------------------------------|---------------|-----------------------|--------------------------------------|---------------------------------------------|
| MoS <sub>2</sub> @Fe/Ni-MOF600-3                        | 1M KOH        | 340                   | 159.8                                | Fuel 339 (2023) 127395                      |
| NiCo <sub>2x</sub> Fe <sub>x</sub> O <sub>4</sub> NBs   | 1M KOH        | 274                   | 42                                   | Angew. Chem. Int. Ed. 2021, 60, 11841–11846 |
| FeCoNiPB                                                | 1M KOH        | 235                   | 53                                   | Nano Res. 2022, 15(10): 8751–8759           |
| FeNiMoCrAl HEA thin film                                | 1M KOH        | 220                   | 27.3                                 | Small 2022, 18, 2106127                     |
| 3D PG-NiCoFe-211                                        | 1M KOH        | 313                   | 51.9                                 | J. Energy Chem. 53 (2021) 260–267           |
| FeCoMoPB amorphous nanoplate                            | 1M KOH        | 239                   | 53                                   | Small 2022, 2204135                         |
| MnFeCoNiCu@MOFs/CC                                      | 1M KOH        | 263                   | 43                                   | J. Mater. Chem. A, 2020, 8, 11938           |
| FeCoNiMnW HEA                                           | 1M KOH        | 512                   | 145                                  | Chem. Eng. J. 446 (2022) 137452             |
| FeCoNiMnMo HEA                                          | 1M KOH        | 279                   | 56.1                                 | ACS Catal. 2022, 12, 19, 11667–11674        |
| FeCoNiCrVB                                              | 1M KOH        | 237                   | 24.2                                 | New J. Chem. 2022, 46, 8398                 |
| Co <sub>1.3</sub> Ni <sub>0.5</sub> Fe <sub>0.2</sub> P | 1M KOH        | 320                   | 45                                   | Sci. China Mater. 2022, 65(10): 2685–2693   |
| <b>FeCoNiMnCr@MoS<sub>2</sub>-CC</b>                    | <b>1M KOH</b> | <b>210</b>            | <b>40.3</b>                          | <b>This work</b>                            |
